# Supplementary material for: Analytical Parameters of an Amperometric Glucose Biosensor for Fast Analysis in Food Samples
Source: MDPI journal article supplement (doi:10.3390/s17112620), 2017-11-14
Supplement: s1 [file s1]

## Supplementary Materials

**Table S1.** Study of the system repeatability. Measurements done during the same laboratory session.

| Replicate | [Glucose]<br>/M | [Glucose]<br>average / M | s / M                 | RSD / % |
|-----------|-----------------|--------------------------|-----------------------|---------|
| 1         | 0.15            | 0.15                     | $1.19 \times 10^{-3}$ | 0.8     |
| 2         | 0.15            |                          |                       |         |
| 3         | 0.16            |                          |                       |         |
| 4         | 0.15            |                          |                       |         |
| 5         | 0.15            |                          |                       |         |

**Table S2.** Study of the system reproducibility. Measurements done during five days over five lemon samples.

| Sample | [Glucose]<br>/ M | [Glucose]<br>average /<br>M | s / M                 | RSD / % |
|--------|------------------|-----------------------------|-----------------------|---------|
| 1      | 0.15             | 0.15                        | $3.75 \times 10^{-2}$ | 2.5     |
| 2      | 0.15             |                             |                       |         |
| 3      | 0.14             |                             |                       |         |
| 4      | 0.15             |                             |                       |         |
| 5      | 0.15             |                             |                       |         |

**Table S3.** Study of the method robustness. The measurements were done with five different Chitosan-GOx/TiO<sub>2</sub>NAs/Ti biosensors.

| Biosensor | [Glucose]<br>/ M | [Glucose]<br>average / M | s / M                 | RSD / % |
|-----------|------------------|--------------------------|-----------------------|---------|
| 1         | 0.14             | 0.15                     | $4.82 \times 10^{-3}$ | 3.3     |
| 2         | 0.15             |                          |                       |         |
| 3         | 0.15             |                          |                       |         |
| 4         | 0.14             |                          |                       |         |
| 5         | 0.15             |                          |                       |         |
